# Supplementary material for: Design and application of a customizable relational DataBase to assess clinicopathological correlations and concomitant pathology in neurodegenerative diseases
Source: PubMed Central journal article supplement — Brain Pathol. 2022 Dec 19;33(3):e13138. doi: 10.1111/bpa.13138 (PMC10154372; doi:10.1111/bpa.13138), 2022-12-19
Supplement: BPA-33-e13138-s002.pdf [file BPA-33-e13138-s002.pdf]

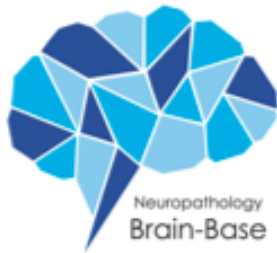

# BRAIN\_BASE\_ANGERS

Laboratory of Neurobiology and Neuropathology

Dr Philippe CODRON - Dr Isabelle JOURNE  
Dr Franck LETOURNEL - Dr Virginie PICHON

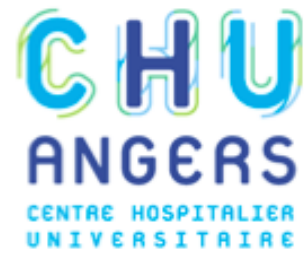

## PATIENT IDENTIFICATION

|                          |                                                                                                        |           |                      |
|--------------------------|--------------------------------------------------------------------------------------------------------|-----------|----------------------|
| N° DIAMIC                | <input type="text"/>                                                                                   | PATIENT   | <input type="text"/> |
| DATE OF BIRTH (MM/DD/YY) | <input type="text"/>                                                                                   | HISTORY   | <input type="text"/> |
| SEX                      | Female <input type="checkbox"/> Male <input type="checkbox"/> Not known <input type="checkbox"/>       | TREATMENT | <input type="text"/> |
| LATERALITY               | <input type="checkbox"/> Right-handed <input type="checkbox"/> Left-handed <input type="checkbox"/> NK | LIFESTYLE | <input type="text"/> |

## CLINICAL EVALUATION

|                                              |                                                     |                                                    |
|----------------------------------------------|-----------------------------------------------------|----------------------------------------------------|
| AGE OF ONSET <input type="text"/>            | <input type="checkbox"/> ANXIO-DEPRESSIVE DISORDERS | <input type="checkbox"/> PERIPHERAL MOTOR SYMPTOMS |
| <input type="checkbox"/> MEMORY DISORDERS    | <input type="checkbox"/> HALLUCINATIONS / DELIRIUM  | <input type="checkbox"/> CENTRAL MOTOR SYMPTOMS    |
| <input type="checkbox"/> PHASIC DISORDERS    | <input type="checkbox"/> BEHAVIORAL DISORDERS       | <input type="checkbox"/> BULBAR SYMPTOMS           |
| <input type="checkbox"/> PRAXIS DISORDERS    | <input type="checkbox"/> EXTRAPYRAMIDAL SYNDROME    | <input type="checkbox"/> VISUAL DISTURBANCES       |
| <input type="checkbox"/> EXECUTIVE DISORDERS | <input type="checkbox"/> MOVEMENT DISORDERS         | <input type="checkbox"/> WALKING DISORDERS         |

FURTHER DETAILS

## PARACLINICAL EXAMINATIONS

|                                                    |                                               |                                                  |
|----------------------------------------------------|-----------------------------------------------|--------------------------------------------------|
| <input type="checkbox"/> BIOLOGICAL ABNORMALITY    | <input type="checkbox"/> ENMG ABNORMALITY     | <input type="checkbox"/> CSF BIOMARKER           |
| DETAILS <input type="text"/>                       | DETAILS <input type="text"/>                  | DETAILS <input type="text"/>                     |
| <input type="checkbox"/> LP (CSF) ABNORMALITY      | <input type="checkbox"/> TEP-SCAN ABNORMALITY | <input type="checkbox"/> 14-3-3 PROTEIN POSITIVE |
| DETAILS <input type="text"/>                       | DETAILS <input type="text"/>                  | DETAILS <input type="text"/>                     |
| <input type="checkbox"/> CT-scan / MRI ABNORMALITY | <input type="checkbox"/> DAT-SCAN ABNORMALITY | <input type="checkbox"/> FURTHER DETAILS         |
| DETAILS <input type="text"/>                       | DETAILS <input type="text"/>                  | <input type="text"/>                             |
| <input type="checkbox"/> NEUROPSYCHOLOGICAL TESTS  | <input type="checkbox"/> GENETIC MUTATIONS    |                                                  |
| DETAILS <input type="text"/>                       | DETAILS <input type="text"/>                  |                                                  |

### CLINICAL DIAGNOSIS

CLINICAL DIAGNOSIS N°1

CLINICAL DIAGNOSIS N°2

CLINICAL DIAGNOSIS N°3

FURTHER DETAILS

PROPOSED TREATMENT

### DEATH AND BRAIN SAMPLE

|                                                                                   |                                                                                          |
|-----------------------------------------------------------------------------------|------------------------------------------------------------------------------------------|
| DATE OF DEATH <input style="width: 80%; border: 1px solid #ccc;" type="text"/>    | DATE OF SAMPLE <input style="width: 80%; border: 1px solid #ccc;" type="text"/>          |
| AGE AT DEATH <input style="width: 80%; border: 1px solid #ccc;" type="text"/>     | POSTMORTEM INTERVAL (H) <input style="width: 80%; border: 1px solid #ccc;" type="text"/> |
| CITY OF DEATH <input style="width: 80%; border: 1px solid #ccc;" type="text"/>    | SUSPICION OF PRION DISEASE <input type="checkbox"/> YES <input type="checkbox"/> NO      |
| PLACE OF DEATH <input style="width: 80%; border: 1px solid #ccc;" type="text"/>   | SPINAL CORD SAMPLE <input type="checkbox"/> YES <input type="checkbox"/> NO              |
| REASON for death <input style="width: 80%; border: 1px solid #ccc;" type="text"/> | NEURO - CEB <input type="checkbox"/> YES <input type="checkbox"/> NO                     |

### IMMEDIATE MACROSCOPIC ANALYSIS

|                                                                                      |                                                                                                       |
|--------------------------------------------------------------------------------------|-------------------------------------------------------------------------------------------------------|
| BRAIN WEIGHT (KG) <input style="width: 80%; border: 1px solid #ccc;" type="text"/>   | FORMALIN HEMISPHERE <input type="checkbox"/> R <input type="checkbox"/> L <input type="checkbox"/> x2 |
| BRAIN INJURY(ISE) FOUND <input type="checkbox"/> YES <input type="checkbox"/> NO     | PRECISION / FURTHER DETAILS :                                                                         |
| DETAILS IF OBSERVED <input style="width: 80%; border: 1px solid #ccc;" type="text"/> | <input style="width: 80%; border: 1px solid #ccc;" type="text"/>                                      |

### FORMALDEHYDE MACROSCOPIC ANALYSIS

|                                                                               |                                                                          |
|-------------------------------------------------------------------------------|--------------------------------------------------------------------------|
| BRAIN HERNATION : <input type="checkbox"/> YES <input type="checkbox"/> NO    | SN HYPOPIGMT° : <input type="checkbox"/> YES <input type="checkbox"/> NO |
| ATROPHY : <input type="checkbox"/> YES <input type="checkbox"/> NO            | LC HYPOPIGMT° : <input type="checkbox"/> YES <input type="checkbox"/> NO |
| ISCHEMIC STROKE : <input type="checkbox"/> YES <input type="checkbox"/> NO    | HEMORRHAGE : <input type="checkbox"/> YES <input type="checkbox"/> NO    |
| DEMYELINATED PLAQUES <input type="checkbox"/> YES <input type="checkbox"/> NO | BRAIN TUMOR : <input type="checkbox"/> YES <input type="checkbox"/> NO   |
| ATHEROSCLEROSIS : <input type="checkbox"/> YES <input type="checkbox"/> NO    | PRECISION / FURTHER DETAILS :                                            |

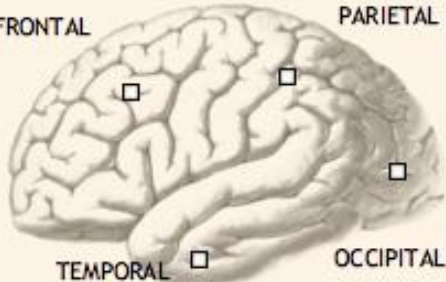

|                                   |                                    |                                          |
|-----------------------------------|------------------------------------|------------------------------------------|
| FRONTAL <input type="checkbox"/>  | PARIETAL <input type="checkbox"/>  | CAUDATE NUCLEUS <input type="checkbox"/> |
| TEMPORAL <input type="checkbox"/> | OCCIPITAL <input type="checkbox"/> | CEREBELLUM <input type="checkbox"/>      |
|                                   |                                    | SPINAL CORD <input type="checkbox"/>     |
|                                   |                                    | RADICULAR <input type="checkbox"/>       |

PRECISION / FURTHER DETAILS :

**MICRO STAINING : NEURONAL LOSS**

NEURONAL LOSS :  YES  NO  
LOCALISATION IF SO :

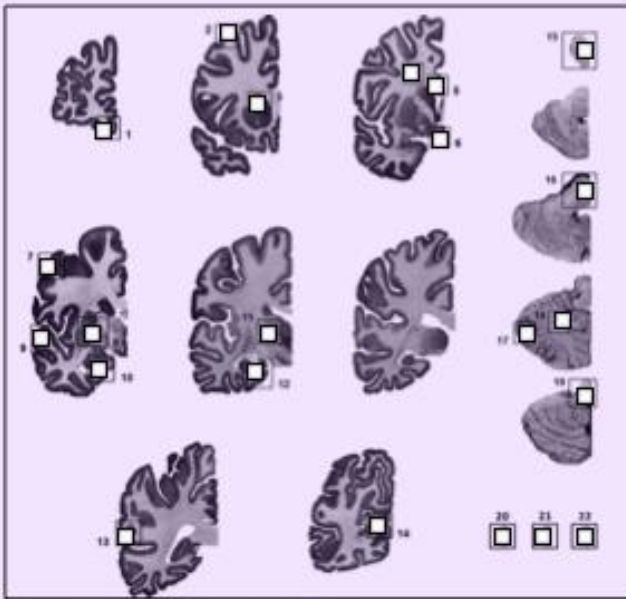

PRECISION / FURTHER DETAILS :

**MICRO STAINING : GLIOSIS (ASTRO/MICRO)**

GLIOSIS (ASTRO/MICRO) :  YES  NO  
LOCALISATION IF SO :

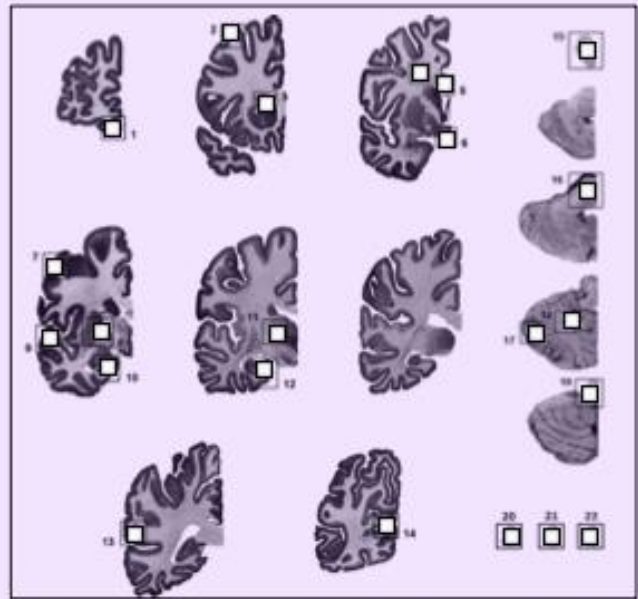

PRECISION / FURTHER DETAILS :

**MICRO STAINING : SPONGIOSIS**

SPONGIOSIS :  YES  NO  
LOCALISATION IF SO :

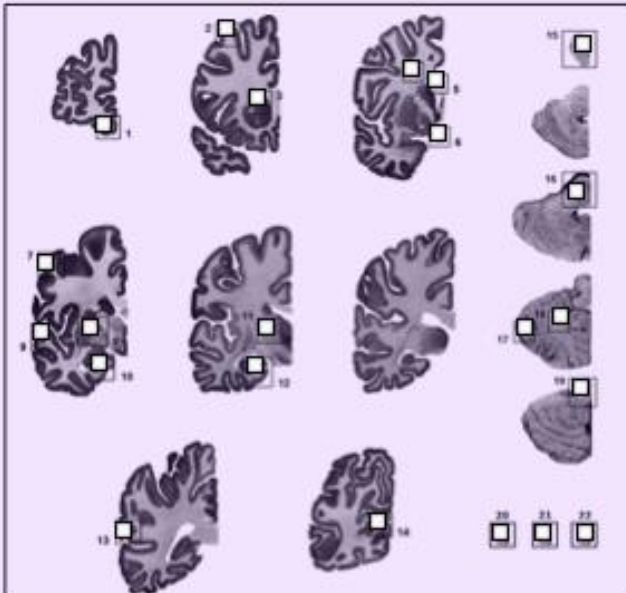

PRECISION / FURTHER DETAILS :

**MICRO STAINING : OTHER DAMAGE(S)**

OTHER DAMAGE(S) :  YES  NO  
LOCALISATION IF SO :

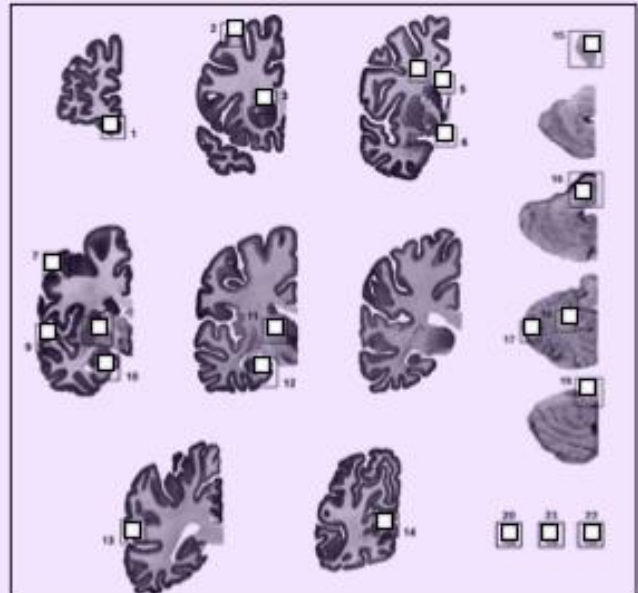

PRECISION / FURTHER DETAILS :

**MICRO IHC : ANTIBODIES USED**

- |                                          |                                        |
|------------------------------------------|----------------------------------------|
| <input type="checkbox"/> UBIQUITIN       | <input type="checkbox"/> P62           |
| <input type="checkbox"/> A-BETA 40       | <input type="checkbox"/> A-BETA 42     |
| <input type="checkbox"/> TAU             | <input type="checkbox"/> pTAU          |
| <input type="checkbox"/> 3R TAU          | <input type="checkbox"/> 4R TAU        |
| <input type="checkbox"/> A-SYNUCLEIN     | <input type="checkbox"/> TDP-43        |
| <input type="checkbox"/> pTDP-43         | <input type="checkbox"/> FUS           |
| <input type="checkbox"/> SOD1            | <input type="checkbox"/> POLYGLUTAMINE |
| <input type="checkbox"/> PrP             | <input type="checkbox"/> NEUROFILAMENT |
| <input type="checkbox"/> CYSTC           | <input type="checkbox"/> MBP           |
| <input type="checkbox"/> CD3             | <input type="checkbox"/> CD20          |
| <input type="checkbox"/> CD68            | <input type="checkbox"/> IBA1          |
| <input type="checkbox"/> BETA CRYSTALLIN | <input type="checkbox"/> GFAP          |

OTHER :

**MICRO IHC : UBIQUITIN PATHOLOGY**

UBIQUITIN PATHOLOGY :  YES  NO  
LOCALISATION IF SO :

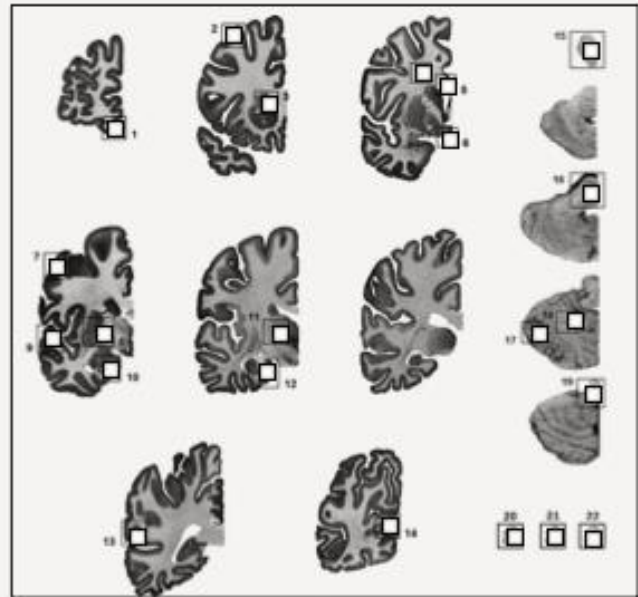

FURTHER DETAILS :

**MICRO IHC : AMYLOID BETA PATHOLOGY**

AMYLOID BETA PATHOLOGY :  YES  NO  
LOCALISATION IF SO :

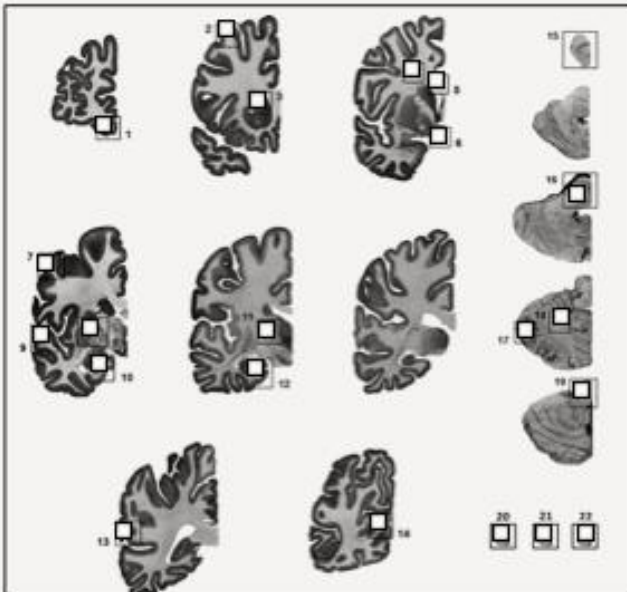

DETAILS :

(A) THAL SCORE :

**MICRO IHC : TAU PATHOLOGY**

TAU PATHOLOGY :  YES  NO  
LOCALISATION IF SO :

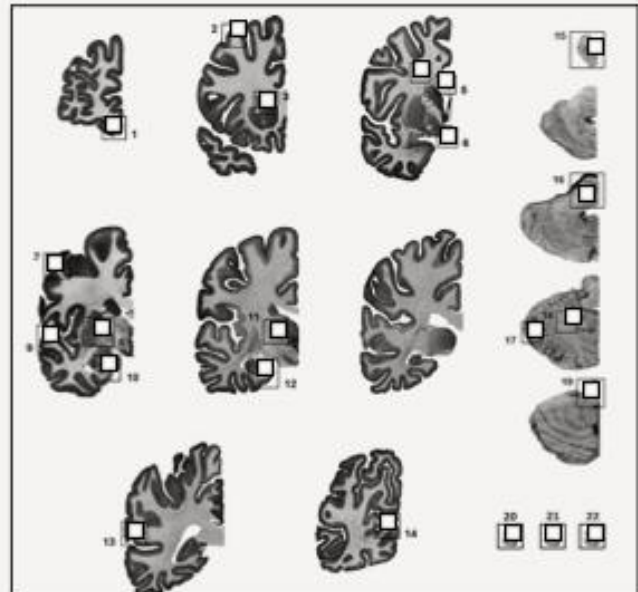

(B) BRAAK STAGE :

DETAILS :

(C) CERAD SCORE :

**MICRO IHC : SYNUCLEIN PATHOLOGY**

SYNUCLEIN PATHOLOGY :  YES  NO

LOCALISATION IF SO :

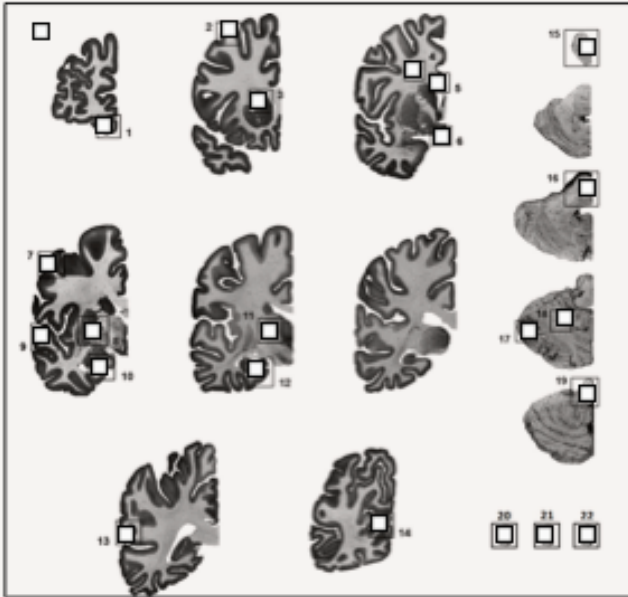

BRAAK STAGE :

DETAILS :

1  2  3  4  5  6

SEVERITY

**MICRO IHC : TDP-43 PATHOLOGY**

TDP-43 PATHOLOGY :  YES  NO

LOCALISATION IF SO :

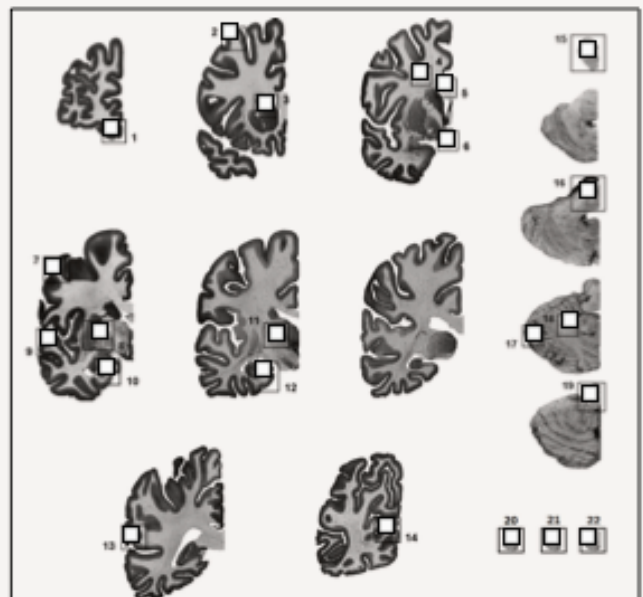

MACKENZIE CLASSIFICATION :

DETAILS :

A  B  C  D

SEVERITY

**MICRO IHC : TRIPLET REPEAT PATHOLOGY**

TRIPLET PATHOLOGY :  YES  NO

LOCALISATION IF SO :

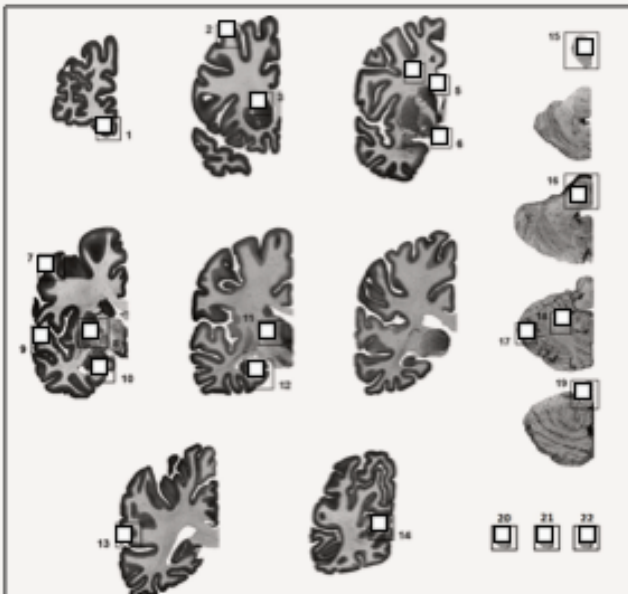

FURTHER DETAILS :

**MICRO IHC : A-BETA VASCULAR PATHOLOGY**

A-BETA VASCU PATHOLOGY :  YES  NO

LOCALISATION IF SO :

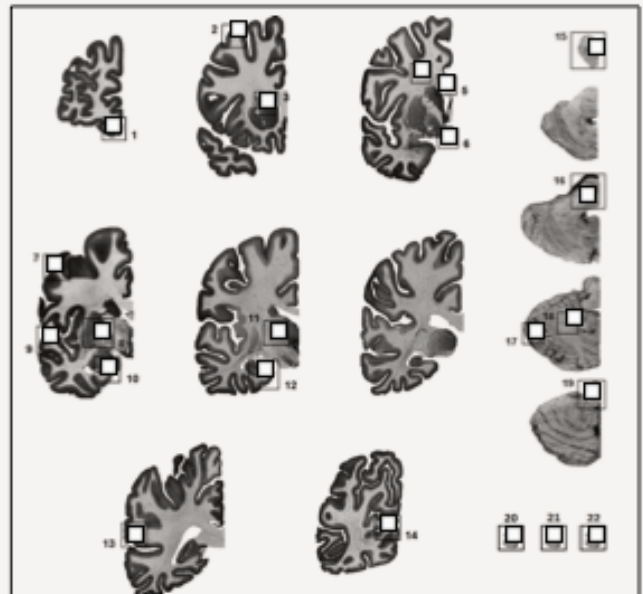

FURTHER DETAILS :

**MICRO IHC : OTHER LABELLING**

IHC OTHER PATHOLOGY :  YES  NO  
 LOCALISATION IF SO :

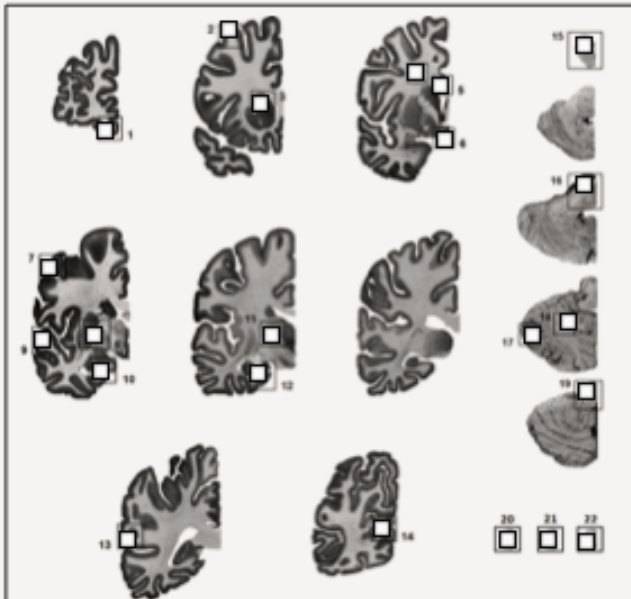

DETAILS (ANTIBODIES, DAMAGES) :

**MICRO IHC : OTHER LABELLING**

IHC OTHER PATHOLOGY :  YES  NO  
 LOCALISATION IF SO :

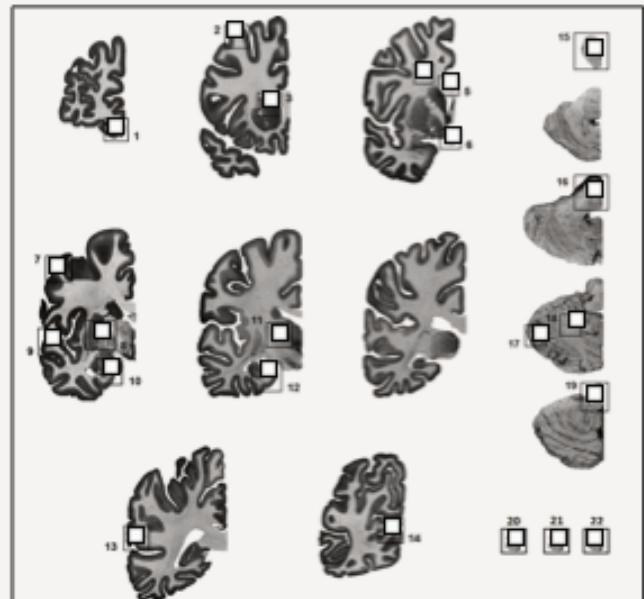

DETAILS (ANTIBODIES, DAMAGES) :

**HISTOLOGICAL DIAGNOSIS**

HISTOLOGICAL DIAGNOSIS N° 1

HISTOLOGICAL DIAGNOSIS N° 2

HISTOLOGICAL DIAGNOSIS N° 3

FURTHER DETAILS

**FINAL DIAGNOSIS**

FINAL DIAGNOSIS SELECTED

DETAILS

CLINICOPATHOLOGICAL CORRELATION  CONCORDANT  DISCORDANT

**DIDACTIC CASE**

DIDACTIC CASE :  YES  NO
